# Supplementary material for: The common personal behavior and preventive measures among 42 uninfected travelers from the Hubei province, China during COVID-19 outbreak: a cross-sectional survey in Macao SAR, China
Source: PeerJ journal article supplement (doi:10.7717/peerj.9428), 2020-06-19
Supplement: Supplemental_Other_S2.pdf [file Supplemental_Other_S2.pdf]

# Questionnaire Survey for travelers returned from Hubei province

Year/Month/Date

(English Translation)

## A. Personal Information

Name: \_\_\_\_\_ Gender:  Male  Female Date of Birth: \_\_\_\_\_

Nationality: \_\_\_\_\_ Telephone: \_\_\_\_\_ Occupation: \_\_\_\_\_

Education level:  Primary education  Secondary education  
 Bachelor's degree  Master's degree or above

Address in Hubei:

---

## B. Personal health conditions and habits:

1. What is the most important reason(s) of not getting COVID-19 in your opinion? (Can select more than one option):
  - Good health condition
  - Good personal protective measures
  - Stay away from the crowd / Decrease cluster or gathering incidence
  - Relatively safe in the community
  - Diet and lifestyle (Balanced diet 、 Physical training)
2. During Hubei outbreak, did you take any medications/health products to prevent the disease?
  - Yes, please tick the following:
    - Medicine, please specify the name: \_\_\_\_\_
    - Herbal medicine, please specify the name: \_\_\_\_\_
    - Health products (Dietary supplements /Vitamins, etc.)  
Please specify the name: \_\_\_\_\_
  - No

3. What was your mood when you were in Hubei?  
 Nervous       Anxious       Worried       Calm  
Other, please specify: \_\_\_\_\_
4. Do you have any chronic disease(s) ?  
 Yes, please tick the follow option(s):  
 Hypertension       Coronary artery disease       Diabetes Mellitus  
 Dyslipidemia       Gout/Hyperuricemia  
 Cerebrovascular disease (Stroke)       Chronic kidney disease  
 Hepatitis       Cirrhosis  
 Chronic obstructive pulmonary disease  
 Other, please specify: \_\_\_\_\_
- No
5. Do you have the habit of chronic medications use ?  
 Yes, please specify: \_\_\_\_\_  
 No
6. Do you have the habit of chronic herbal medicine use ?  
 Yes, please specify: \_\_\_\_\_  
 No
7. What is your usual preference on choosing medicine / herbal medicine when you are sick ?  
 Herbal medicine       Medicine
8. During Hubei outbreak, please tick the following options regarding your health promotion behavior:  
Doing sport:       Less than before       No change       More than before  
Enough sleep:       Less than before       No change       More than before  
Drink more water:       Less than before       No change       More than before  
Buy mask and disinfectants:       Less than before       No change       More than before  
Wash hands:       Less than before       No change       More than before  
Search for health information:       Less than before       No change       More than before



4. Number of people cohabit with: \_\_\_\_\_ people
5. Area of residence: \_\_\_\_\_ square feet
6. Number of people cohabit to share the bedroom:
- Alone  2 people  3 people  4 people or above
7. Besides the above written address, did you visit other cities in Hubei province ?  Yes  No

If yes, please specify:

- i. Name of city \_\_\_\_\_ Days of stay \_\_\_\_\_  
Reason \_\_\_\_\_ Means of transport \_\_\_\_\_
- ii. Name of city \_\_\_\_\_ Days of stay \_\_\_\_\_  
Reason \_\_\_\_\_ Means of transport \_\_\_\_\_
- iii. Name of city \_\_\_\_\_ Days of stay \_\_\_\_\_  
Reason \_\_\_\_\_ Means of transport \_\_\_\_\_

8. During your stay in Hubei, did you visit other provinces besides Hubei?  Yes  No

If yes, please specify:

- i. Name of province \_\_\_\_\_ Days of stay \_\_\_\_\_  
Reason \_\_\_\_\_ Means of transport \_\_\_\_\_
- ii. Name of province \_\_\_\_\_ Days of stay \_\_\_\_\_  
Reason \_\_\_\_\_ Means of transport \_\_\_\_\_
- iii. Name of province \_\_\_\_\_ Days of stay \_\_\_\_\_  
Reason \_\_\_\_\_ Means of transport \_\_\_\_\_

9. Daily life during stay in Hubei:

- Buy daily commodities by yourself
- Receive daily supply via the unified delivery

10. Did you receive phone call from your clinic during stay in Hubei?

- Yes  No

#### D. Contact History

1. During stay in Hubei, who were the people you have contact with mostly?

Family  Friends  Colleagues  Others \_\_\_\_\_

2. During stay in Hubei, did you go to any hospital or clinic? Yes No

If yes, reason of go to hospital or clinic: \_\_\_\_\_

Date and duration of stay: \_\_\_\_\_

3. During stay in Hubei, did you have any admission history in hospital? Yes No

If yes, reason of admission, name of hospital and duration of stay:

\_\_\_\_\_

People you have contact with mostly during admission:  Family  Friends  Working staff

4. During stay in Hubei, did you have contact with suspected/confirmed COVID-19 patients?

Yes No

If yes, way of contact (e.g. having meal): \_\_\_\_\_

Duration of contact: 10min or less 10-30min 30min or more

5. During stay in Hubei, did your family have contact with suspected/confirmed COVID-19 patients ?

Yes No

If yes, way of contact (e.g. having meal): \_\_\_\_\_

Duration of contact: 10min or less 10-30min 30min or more

6. Were there any confirmed COVID-19 cases in the local community you stayed in Hubei?

Yes No

If yes, please specify: \_\_\_\_\_

7. Between 01/01 to “lockdown” period, did you do the following:

Use of public transportation No  Yes Specify:

Go to supermarket Date\_\_\_\_\_ Duration of stay \_\_\_\_\_

Go to traditional market (wet market) Date\_\_\_\_\_ Duration of stay \_\_\_\_\_

Visit crowded places:

\_\_\_\_\_ Date \_\_\_\_\_ Duration of stay \_\_\_\_\_

8. During stay in Hubei, did you have any contact with live poultry? Yes No
9. During stay in Hubei, have you eaten any game meats (e.g. civets, bats, etc.)? Yes No

**E. Personal preventive measures conditions during the outbreak**

1. Where did you receive the information of prevention ?  
 Television  Radio  Newspapers  Social media (e.g. “Wechat”)
2. Which kind of mask you mostly use during the outbreak?  
 Cloth/Dust mask  Surgical mask  N95 or above grade respirator
3. Did you wear a mask when outdoor during the Hubei outbreak ?  
Every time Occasional No
4. Did you wear a mask when contact/talk with people (except those living together) during the Hubei outbreak ?  
Every time Occasional No
5. What do you think about the frequency of accidental face or nose touching after wearing a mask?  
Decrease Unchange Increase
6. Do you think that it is less important to wash hands after wearing a mask?  Yes No
7. During Hubei outbreak, did you often wash your hands with soap/liquid soap?  
Yes No

8. During Hubei outbreak, if there was no handwashing facility on-site, would you wash your hands with alcohol-based hand sanitizers or disinfected wipes? Yes No

9. During Hubei outbreak, did you clean and disinfect your house regularly (e.g., using 1:99 bleach water or other disinfectants)? Yes No

If yes, frequency of household cleaning and disinfection:

Once a day Once every 2-3 days Once a week or more than a week

10. During Hubei outbreak, did you clean mobile phone regularly? Yes No

11. During Hubei outbreak, did you clean clothes and personal belongings immediately once you get back home? Yes No

12. During Hubei outbreak, did you attend any meal gatherings (except for family members cohabit with) regularly? Yes No

If yes, total number of gatherings: 1-2 times 3-5times  > 5times

Number of meal gatherings per month in Hubei: \_\_\_\_\_times

People you had meal with (Can choose more than one option):

Relatives Neighbors Friends Colleagues Others\_\_\_\_\_

Have you joined the “Bai Bu Ting” banquet? Yes No

13. During Hubei outbreak, did you have the following change in diet habit? (Can choose more than one option):

Drink more water Eat more vegetables and fruits Less fried food

#### **F. Personal preventive measures conditions in Macau before the outbreak**

1. When you were in Macau before outbreak, did you wear a mask every time when outdoor? Yes No

2. When you were in Macau before outbreak, did you wear a mask when contact/talk with people (except those living together)?

Every time Occasional No

3. When you were in Macau before outbreak, did you often wash your hands with soap/liquid soap? Yes No

4. When you were in Macau before outbreak, if there was no handwashing facility on-site, would you wash your hands with alcohol-based hand sanitizers or disinfected wipes? Yes No

5. When you were in Macau before outbreak, did you clean and disinfect your house regularly (e.g., using 1:99 bleaching water or other disinfectants)? Yes No

If yes, frequency of household cleaning and disinfection:

Once a day Once every 2-3 days Once a week or more than a week

6. When you were in Macau before outbreak, did you clean mobile phone regularly? Yes No

7. When you were in Macau before outbreak, did you clean clothes and personal belongings immediately once you get back home? Yes No

8. When you were in Macau before outbreak, did you attend any meal gatherings (except for family members cohabit with) regularly? Yes No

If yes, number of meal gatherings per month in Macao: \_\_\_\_\_ times

People you had meal with (Can choose more than one option):

Relatives Neighbors Friends Colleagues Others\_\_\_\_\_

-----  
The following will be filled in by medical staff

Body Height: \_\_\_\_\_ Body weight: \_\_\_\_\_

Chronic diseases: \_\_\_\_\_
